# Supplementary material for: Screening outcomes by risk factor and age: evidence from BreastScreen WA for discussions of risk‐stratified population screening
Source: PubMed Central journal article supplement — Med J Aust. 2021 Aug 9;215(8):359–65. doi: 10.5694/mja2.51216 (PMC9290915; doi:10.5694/mja2.51216), 2021-08-09
Supplement: MJA2-215-359-s001.pdf [file MJA2-215-359-s001.pdf]

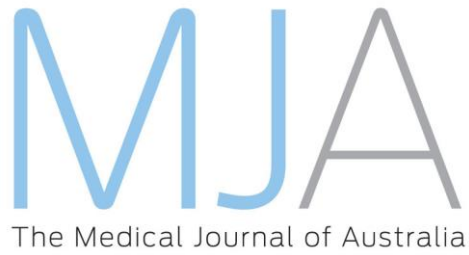

## **Supporting Information**

### **Supplementary results**

**This appendix was part of the submitted manuscript and has been peer reviewed.  
It is posted as supplied by the authors.**

Appendix to: Noguchi N, Marinovich ML, Wylie EJ, et al. Screening outcomes by risk factor and age: evidence from BreastScreen WA for discussions of risk-stratified population screening. *Med J Aust* 2021; doi: 10.5694/mja2.51216.

**Table 1. Numbers of screening episodes per woman**

| Screen episodes       | Women          |
|-----------------------|----------------|
| Total number of women | 323 082        |
| 1                     | 76 848 (23.8%) |
| 2                     | 54 750 (17.0%) |
| 3                     | 47 184 (14.6%) |
| 4                     | 58 754 (18.2%) |
| 5                     | 71 748 (22.2%) |
| 6 or more             | 13 798 (3.3%)  |

**Table 2. Characteristics of screen-detected cancers\***

| Characteristic                          |              |
|-----------------------------------------|--------------|
| Pathological tumour size category       | 7024         |
| pTis (ductal carcinoma in situ)         | 1551 (22.1%) |
| pT1a ( $\leq 5$ mm)                     | 502 (7.1%)   |
| pT1b ( $> 5$ mm, $\leq 10$ mm)          | 1299 (18.5%) |
| pT1c ( $> 10$ mm, $\leq 20$ mm)         | 2313 (32.9%) |
| pT2 ( $> 20$ mm, $\leq 50$ mm)          | 1184 (16.9%) |
| pT3 ( $> 50$ mm)                        | 144 (2.1%)   |
| Unknown                                 | 31 (0.4%)    |
| Axillary nodal status (invasive cancer) | 5472         |
| Negative for metastasis                 | 3731 (68.2%) |
| Positive for metastasis                 | 1208 (22.1%) |
| Unknown                                 | 533 (9.7%)   |

The proportion of screen-detected small invasive cancers ( $< 15$  mm) was 49% (478/980) in first screens and 61% (2707/4462) in subsequent screens.

\* BreastScreen WA does not collect data on cancer characteristics (size, nodal status) for interval cancers because they are often diagnosed outside the program.

**Table 3. Cancer detection rate (CDR) at screening by age group for risk factors (excludes initial screens)**

| Risk factor/Age group (years)                       | Yes     |         |                 | No      |         |               | Difference in CDR (yes v no) (95% CI) |
|-----------------------------------------------------|---------|---------|-----------------|---------|---------|---------------|---------------------------------------|
|                                                     | Screens | Cancers | CDR (95% CI)    | Screens | Cancers | CDR (95% CI)  |                                       |
| <b>Personal history of breast cancer</b>            |         |         |                 |         |         |               |                                       |
| 40–49                                               | 922     | 6       | 65 (29–145)     | 78958   | 282     | 36 (32–40)    | 29 (–23 to 81)                        |
| 50–59                                               | 8688    | 67      | 77 (61–98)      | 343085  | 1590    | 46 (44–49)    | 31 (12–49)                            |
| 60–69                                               | 16710   | 204     | 122 (107–140)   | 328517  | 2414    | 73 (71–76)    | 49 (32–66)                            |
| 70 or more                                          | 10609   | 131     | 123 (104–146)   | 90147   | 1050    | 116 (110–124) | 7 (–15 to 29)                         |
| <b>Personal history of ovarian cancer</b>           |         |         |                 |         |         |               |                                       |
| 40–49                                               | 238     | 0       | 0               | 79642   | 288     | 36 (32–41)    | –36 (–1307 to 1234)                   |
| 50–59                                               | 1490    | 6       | 40 (18–89)      | 350284  | 1651    | 47 (45–49)    | –7 (–39 to 25)                        |
| 60–69                                               | 2429    | 10      | 41 (22–76)      | 342796  | 2608    | 76 (73–79)    | –35 (–61 to –9)                       |
| 70 or more                                          | 840     | 4       | 48 (18–127)     | 99913   | 1177    | 118 (111–125) | –70 (–117 to –23)                     |
| <b>Family history of breast cancer</b>              |         |         |                 |         |         |               |                                       |
| 40–49                                               | 20840   | 87      | 42 (34–51)      | 59040   | 201     | 34 (30–39)    | 8 (–2 to 18)                          |
| 50–59                                               | 70402   | 397     | 56 (51–62)      | 281373  | 1260    | 45 (42–47)    | 12 (6–18)                             |
| 60–69                                               | 72424   | 641     | 89 (82–96)      | 272803  | 1977    | 72 (69–76)    | 16 (9–24)                             |
| 70 or more                                          | 25294   | 373     | 147 (133–163)   | 75462   | 808     | 107 (100–115) | <b>40 (24–57)</b>                     |
| <b>Dense breasts*</b>                               |         |         |                 |         |         |               |                                       |
| 40–49                                               | 18561   | 86      | 46 (38–57)      | 27829   | 78      | 28 (22–35)    | 18 (6–30)                             |
| 50–59                                               | 56491   | 297     | 53 (47–59)      | 152678  | 580     | 38 (35–41)    | 15 (8–21)                             |
| 60–69                                               | 36458   | 306     | 84 (75–94)      | 182695  | 1160    | 63 (60–67)    | 20 (10–30)                            |
| 70 or more                                          | 6507    | 81      | 124 (100–155)   | 43748   | 376     | 86 (78–95)    | 39 (10–67)                            |
| <b>Biopsy for benign disease</b>                    |         |         |                 |         |         |               |                                       |
| 40–49                                               | 11572   | 47      | 41 (31–54)      | 68308   | 241     | 35 (31–40)    | 5 (–7 to 18)                          |
| 50–59                                               | 62218   | 377     | 61 (55–67)      | 289557  | 1280    | 44 (42–47)    | 16 (10–23)                            |
| 60–69                                               | 69330   | 659     | 95 (88–103)     | 275897  | 1959    | 71 (68–74)    | <b>24 (16–32)</b>                     |
| 70 or more                                          | 21152   | 312     | 148 (132–165)   | 79604   | 869     | 109 (102–117) | <b>38 (21–56)</b>                     |
| <b>Hormone replacement therapy in past 6 months</b> |         |         |                 |         |         |               |                                       |
| 40–49                                               | 4882    | 11      | 23 (12–41)      | 74993   | 277     | 37 (33–42)    | –14 (–28 to 0)                        |
| 50–59                                               | 52021   | 307     | 59 (53–66)      | 299707  | 1350    | 45 (43–48)    | <b>14 (7–21)</b>                      |
| 60–69                                               | 42710   | 416     | 97 (89–107)     | 302484  | 2201    | 73 (70–76)    | <b>25 (15–34)</b>                     |
| 70 or more                                          | 9056    | 131     | 145 (122–171)   | 91695   | 1049    | 114 (108–122) | <b>30 (5–56)</b>                      |
| <b>Self-reported symptoms</b>                       |         |         |                 |         |         |               |                                       |
| 40–49                                               | 1230    | 18      | 146 (93–231)    | 78650   | 270     | 34 (30–39)    | 112 (45–179)                          |
| 50–59                                               | 2833    | 90      | 318 (259–389)   | 348942  | 1567    | 45 (43–47)    | <b>273 (208–337)</b>                  |
| 60–69                                               | 2121    | 112     | 528 (441–632)   | 343106  | 2506    | 73 (70–76)    | <b>455 (360–550)</b>                  |
| 70 or more                                          | 853     | 93      | 1090 (900–1321) | 99903   | 1088    | 109 (103–116) | <b>981 (772–1191)</b>                 |

CI = confidence interval.

\* Breast density was based on density classification during preceding screen (within 27 months).

**Bold:** Difference is significantly different to that for 40–49-year-old women in this category.

**Table 4. Interval cancer rate (ICR), by age group for risk factors**

| Risk factor/Age group (years)                       | Yes     |         |                   | No      |         |                  | Difference in ICR (yes v no) (95% CI) |
|-----------------------------------------------------|---------|---------|-------------------|---------|---------|------------------|---------------------------------------|
|                                                     | Screens | Cancers | ICR (95% CI)      | Screens | Cancers | ICR (95% CI)     |                                       |
| <b>Personal history of ovarian cancer</b>           |         |         |                   |         |         |                  |                                       |
| 40–49                                               | 340     | 1       | 20.5 (2.9–145.4)  | 142359  | 283     | 10.4 (9.3–11.7)  | 10.1 (–30.1 to 50.3)                  |
| 50–59                                               | 1646    | 1       | 4.6 (0.7–32.7)    | 422566  | 732     | 9.1 (8.5–9.8)    | –4.5 (–13.6 to 4.6)                   |
| 60–69                                               | 2473    | 1       | 3.2 (0.5–22.8)    | 353598  | 626     | 9.5 (8.8–10.3)   | –6.3 (–12.6 to 0.1)                   |
| 70 or more                                          | 860     | 0       | 0                 | 102288  | 222     | 11.8 (9.3–11.7)  | –11.8 (–52.0 to 28.4)                 |
| <b>Family history of breast cancer</b>              |         |         |                   |         |         |                  |                                       |
| 40–49                                               | 31833   | 75      | 14.1 (11.2–17.7)  | 110867  | 209     | 9.6 (8.4–11.0)   | 4.5 (1.1–8.0)                         |
| 50–59                                               | 79707   | 137     | 10.4 (8.8–12.3)   | 344506  | 596     | 8.9 (8.2–9.6)    | 1.6 (–0.3 to 3.5)                     |
| 60–69                                               | 74366   | 123     | 10.3 (8.6–12.3)   | 281707  | 504     | 9.3 (8.5–10.1)   | 1.0 (–1.0 to 3.0)                     |
| 70 or more                                          | 25836   | 43      | 10.1 (7.5–13.6)   | 77315   | 179     | 12.2 (10.5–14.1) | <b>–2.1 (–5.6 to 1.4)</b>             |
| <b>Dense breasts</b>                                |         |         |                   |         |         |                  |                                       |
| 40–49                                               | 54929   | 166     | 15.9 (13.6–18.5)  | 75952   | 90      | 6.2 (5.1–7.6)    | 9.7 (6.9–12.4)                        |
| 50–59                                               | 107399  | 324     | 15.8 (14.2–17.6)  | 285461  | 355     | 6.5 (5.9–7.2)    | 9.3 (7.4–11.1)                        |
| 60–69                                               | 59217   | 217     | 19.4 (17.0–22.1)  | 266970  | 376     | 7.4 (6.7–8.2)    | 12.0 (9.3–14.7)                       |
| 70 or more                                          | 13931   | 69      | 26.2 (20.7–33.2)  | 74830   | 137     | 9.6 (5.1–7.6)    | 16.6 (10.2–23.0)                      |
| <b>Biopsy for benign disease</b>                    |         |         |                   |         |         |                  |                                       |
| 40–49                                               | 17924   | 54      | 16.1 (12.4–21.1)  | 124776  | 230     | 9.7 (8.5–11.0)   | 6.5 (2.0–10.9)                        |
| 50–59                                               | 71516   | 176     | 13.2 (11.4–15.3)  | 352697  | 557     | 8.3 (7.6–9.0)    | 5.0 (2.9–7.0)                         |
| 60–69                                               | 71404   | 186     | 14.2 (12.3–16.4)  | 284669  | 441     | 8.3 (7.6–9.1)    | 6.0 (3.8–8.1)                         |
| 70 or more                                          | 21718   | 75      | 19.0 (15.2–23.9)  | 81433   | 147     | 9.8 (8.3–11.5)   | 9.2 (4.6–13.8)                        |
| <b>Hormone replacement therapy in past 6 months</b> |         |         |                   |         |         |                  |                                       |
| 40–49                                               | 8045    | 12      | 7.8 (4.4–13.8)    | 134646  | 272     | 10.6 (9.4–12.0)  | –2.8 (–7.4 to 1.8)                    |
| 50–59                                               | 59875   | 142     | 12.4 (10.5–14.6)  | 364287  | 591     | 8.6 (7.9–9.3)    | <b>3.8 (1.7–6.0)</b>                  |
| 60–69                                               | 43994   | 143     | 17.2 (14.6–20.2)  | 312046  | 484     | 8.4 (7.6–9.1)    | <b>8.8 (5.9–11.7)</b>                 |
| 70 or more                                          | 9275    | 38      | 21.8 (15.9–30.0)  | 93871   | 184     | 10.7 (9.3–12.4)  | <b>11.1 (4.0–18.2)</b>                |
| <b>Self-reported symptoms</b>                       |         |         |                   |         |         |                  |                                       |
| 40–49                                               | 3226    | 16      | 25.8 (15.8–42.1)  | 139474  | 268     | 10.1 (9.0–11.4)  | 15.7 (3.0–28.4)                       |
| 50–59                                               | 4041    | 26      | 34.2 (23.3–50.2)  | 420172  | 707     | 8.9 (8.2–9.6)    | 25.3 (12.2–38.5)                      |
| 60–69                                               | 2273    | 20      | 48.0 (31.0–74.3)  | 353800  | 607     | 9.2 (8.5–10.0)   | 38.8 (17.8–59.8)                      |
| 70 or more                                          | 915     | 10      | 60.1 (32.4–111.4) | 102236  | 212     | 11.3 (9.9–12.9)  | 48.8 (11.6–85.9)                      |

CI = confidence interval.

**Bold:** Difference is significantly different to that for 40–49-year-old women in this category.
